# Supplementary material for: Drought Stress Described by Transcriptional Responses of <em>Picea Abies</em> under Pathogen <em>Heterobasidion Parviporum</em> Attack
Source: Preprints.org preprint supplement (doi:10.20944/preprints202109.0224.v1), 2021-09-14
Supplement: Supplementary file 3 [file supplementary]

## Sheet: label
Yeoh Hao-Yi X1,2, Durodola B1, Blumenstein K1, Terhonen E*1,3
Drought stress described by transcriptional responses of Picea abies under pathogen Heterobasidion parviporum attack.
1Forest Pathology Research Group, Buesgen-Institute, Department of Forest Botany and Tree Physiology, Faculty of Forest Sciences and Forest Ecology, University of Göttingen, Buesgenweg 2, 37077 Göttingen, Germany
2Faculty of Medicine, Technical University of Munich, Klinikum Rechts der Isar, Ismaninger Stra§e 22, 81675 Munich, Germany
3Natural Resources Institute Finland (Luke), Forest health and biodiversity, Latokartanonkaari 9, FI_00790 Helsinki, Finland

## Sheet: heterobasidion infection
Heterobasidion parviporum (-) group versus Heterobasidion parviporum (+) group
Gene	logFC	logCPM	LR	PValue	FDR
MA_10372673g0020	11.3987620031135	4.41309850762901	142.570897324213	7.29546729342509e-33	2.2397084590815e-28
MA_10381936g0010	7.07973829297994	4.67119604048145	139.950653430743	2.72900738305084e-32	4.18902633298305e-28						down regulated:	70
MA_10431971g0010	-2.39454563890517	7.22671284283164	57.4354930364163	3.49247665400288e-14	3.39401040225432e-10						upregulated	44
MA_135684g0020	2.97755474871079	4.3322694119258	56.9713101986181	4.42216339055937e-14	3.39401040225432e-10						not significant	30586
MA_10433565g0010	-4.16818940380693	2.8974201105548	53.1035079448444	3.16426850183745e-13	1.9428608601282e-09
MA_10386825g0010	4.9156647624097	2.40456426670419	52.2323069120789	4.93082086467183e-13	2.52293667575709e-09
MA_120047g0010	4.79588341903965	3.36602646812838	46.3613287363653	9.83372920945495e-12	4.31279266757524e-08
MA_10436323g0020	4.03366074647347	3.52177460842281	42.2023240256202	8.23021549769182e-11	2.86703100585107e-07
MA_10351800g0010	-2.75012942038851	3.43982790568634	42.0150058686114	9.05756750066824e-11	2.86703100585107e-07
MA_215209g0010	-7.70328439380746	0.922035157550602	41.9552014732519	9.33886321124126e-11	2.86703100585107e-07
MA_9441091g0010	-5.72349839508919	2.70101648387529	40.8026543502713	1.68404196771169e-10	4.70000803715899e-07
MA_441585g0010	-5.09705816310767	1.54884356896055	40.5026749517642	1.9634705319447e-10	5.02321211089187e-07
MA_490893g0010	-5.79855526797428	0.959977456069132	38.7613468598523	4.78918124840715e-10	1.13098357173923e-06
MA_111912g0010	-2.41040598857074	5.71419998259892	38.52126340624	5.41603806039085e-10	1.18765977467142e-06
MA_670512g0010	2.26472359473741	4.6689592271715	38.3711944581221	5.84893934606608e-10	1.19708291949486e-06
MA_10433003g0010	-3.220933761593	3.2365391257387	37.8170409846459	7.77000701497343e-10	1.49087009599803e-06
MA_10244377g0010	-4.20727781407542	2.57891657021578	37.0926232388095	1.12649074638067e-09	2.03430975964039e-06
MA_23704g0020	4.77216694912992	2.68467972132018	35.5140635824013	2.53215739856862e-09	4.31873511866981e-06
MA_8772982g0010	7.44757432525649	0.668851558900678	35.0994607882285	3.13287533551438e-09	5.06206698948902e-06
MA_178006g0010	4.20506979391669	2.33350825622597	34.8467215124903	3.56709721929208e-09	5.47549423161334e-06
MA_329325g0010	-5.84717912766551	1.01351279982168	34.541724183265	4.17211591906341e-09	6.09923612929747e-06
MA_10339967g0020	-3.71661858055941	2.40776549174865	33.7545861771783	6.25214758349471e-09	8.72458776424035e-06
MA_11549g0010	5.42752124219419	2.6089295846147	33.1507294959139	8.5284372832074e-09	1.13836097649768e-05
MA_10432620g0010	4.11491532679031	1.88855122774472	32.7935767787884	1.02482920409201e-08	1.31092735690103e-05
MA_74233g0020	-2.29985225246847	3.29426857376855	32.462985502303	1.21484474576794e-08	1.49182934780303e-05
MA_25670g0010	-2.57106727552019	3.48662951507022	32.0228284178305	1.5237144640835e-08	1.79915515566782e-05
MA_10426120g0010	2.71608039422062	3.99260605966495	31.9158358393047	1.60999242029663e-08	1.80015668714759e-05
MA_625682g0010	3.51179953625944	3.28951420408892	31.8777912121127	1.64183671791963e-08	1.80015668714759e-05
MA_10313797g0010	5.27756084890567	1.05569992513996	31.7728841604454	1.73295321791225e-08	1.83454013068642e-05
MA_161278g0010	-2.23282666149358	5.36135576656603	30.6823365720372	3.03919133876584e-08	3.11010580333705e-05
MA_101156g0010	-4.47479583489283	0.985550548476405	30.5338997022631	3.28083290339176e-08	3.24908290755249e-05
MA_336019g0010	-2.8925244517471	2.72651455918266	30.1603484985802	3.97759077931142e-08	3.8160011539019e-05
MA_697188g0010	-2.83747275922718	3.10206403022703	29.9034902726774	4.54094669285495e-08	4.22445646880748e-05
MA_10434677g0010	-3.59843886298797	1.89859091679315	29.5865795597385	5.34738993971188e-08	4.82837856321044e-05
MA_6804407g0010	-5.2928820865961	0.545234818457346	29.4287849400103	5.80095916282791e-08	5.08826989425191e-05
MA_6389744g0010	-5.62257563938624	7.22591712972335	29.3036028099661	6.18805326915877e-08	5.27703431564373e-05
MA_10334249g0030	6.87423810699392	0.193473423038995	29.0044313794741	7.22129189429486e-08	5.99172057175277e-05
MA_223481g0010	-6.96519849781177	0.296722317675245	28.9114936583532	7.57620197264235e-08	6.12077369895053e-05
MA_10436687g0010	3.64232956308426	5.93277991289548	28.7917450365616	8.05938932115233e-08	6.34418595280453e-05
MA_23704g0010	3.10510146168793	5.22330172652734	28.4509686661059	9.61016721460281e-08	7.37580333720766e-05
MA_10435323g0010	4.20326538677637	3.60275129495781	28.237290278667	1.07316986934795e-07	7.96454820056975e-05
MA_10362105g0020	7.32637808944331	0.532010800162602	28.2078590471204	1.08961245740694e-07	7.96454820056975e-05
MA_348108g0020	-4.72809397944736	1.99067875255968	28.0466145883727	1.18428104153391e-07	8.45521580816069e-05
MA_49332g0010	2.47631381566109	4.40333072067325	27.3817619052677	1.66998832842537e-07	0.000116519640187861
MA_469821g0010	6.75062015321784	0.0912938921311846	27.1574241389392	1.87543613461507e-07	0.000127946420739295
MA_234217g0010	2.60620051621796	2.81102678287275	27.0895997898792	1.94240136713591e-07	0.000129634178197983
MA_78924g0020	-4.94241710936507	0.950972733484947	26.3032338403187	2.91799670116729e-07	0.000186741371881228
MA_192580g0010	-7.67630253642344	0.84853759079341	26.3020837944106	2.91973480465764e-07	0.000186741371881228
MA_10437031g0010	-2.34732604864329	4.10612989498074	26.0120937655548	3.39285325196807e-07	0.000212572642521265
MA_322586g0010	-6.66543117723247	0.0704953647326095	25.7915480704832	3.80350393359534e-07	0.000233535141522754
MA_10045883g0010	3.19043841752591	3.46889787596221	25.3122030753721	4.87614055210511e-07	0.000293524539116916
MA_10436092g0030	-2.76159467277852	2.2055943371009	25.0848280967409	5.48628216352819e-07	0.000323901658500607
MA_10426366g0010	-3.94001155746225	1.58930377851954	24.8569767115337	6.17451729057785e-07	0.000357656001548566
MA_78924g0010	-4.68076131781423	0.728400488479652	24.5668275604157	7.1776776991395e-07	0.00040806426919182
MA_443520g0010	-2.94053943500956	3.81211278737822	24.29796567333	8.25261747163528e-07	0.000460646102507642
MA_96165g0020	-4.1516584794439	1.56568515847932	24.0961778853651	9.16420110616397e-07	0.000502394596355775
MA_257487g0010	4.60977503433319	1.02444377140359	23.484371457157	1.25932604149272e-06	0.000667553104390805
MA_202096g0010	-2.28566608172711	3.92759735063722	23.4815484548072	1.26117524608035e-06	0.000667553104390805
MA_919071g0010	-6.47854472113958	-0.061833844511259	23.1537835444345	1.49548663030075e-06	0.000752999376089906
MA_10426918g0010	2.76464936893636	4.45973266621629	23.1371116023331	1.50850914209774e-06	0.000752999376089906
MA_180174g0010	-2.12634869409331	3.19100544855339	23.1294287318152	1.51454848328605e-06	0.000752999376089906
MA_10434687g0010	-3.29385630459191	3.22295906860763	23.1216152711247	1.52071535236398e-06	0.000752999376089906
MA_10172523g0010	3.04450851810755	1.45086373896332	23.045685998451	1.58197076932922e-06	0.000770896866958843
MA_10437031g0020	-1.9845748772209	3.2177786345491	22.948010495572	1.66442379030383e-06	0.000798403286911368
MA_10083891g0010	-3.04073831668003	2.81048245703639	22.7519578616959	1.84316259981152e-06	0.000870539874064826
MA_8594057g0010	-2.63889064303827	4.03016942512924	22.6257744482509	1.96826338974766e-06	0.00091554069795838
MA_91468g0010	-2.23829391130417	3.92436339610701	22.5193505542923	2.08037360559158e-06	0.000953245816293456
MA_10433066g0010	-1.82232252667764	6.84806584173422	22.188949982698	2.47091815901039e-06	0.0011073003617024
MA_76403g0010	3.15111785850015	1.03006765186467	22.1751669659937	2.4887206826536e-06	0.0011073003617024
MA_10427926g0010	-2.91338965438564	4.99669534419549	21.9976708251088	2.72981540269069e-06	0.00119721904089435
MA_10435930g0010	1.67073074979461	5.09644821511631	21.7812212461097	3.05576408362926e-06	0.00132129517418899
MA_599577g0010	2.92493894067242	2.29407515605227	21.4036353593469	3.72065054272236e-06	0.00158644405085523
MA_874084g0010	-1.71726954828477	5.02759428423084	21.0307952184223	4.51960293034764e-06	0.00190070972550236
MA_10433867g0010	4.40402412065871	1.75109611891665	20.8667356236862	4.92371338241729e-06	0.00203444871715284
MA_10426104g0010	2.44152242803506	2.16973418542231	20.848755225121	4.9701515891356e-06	0.00203444871715284
MA_10433693g0010	-3.0495196387065	3.30050893972162	20.6412176171795	5.53906832059232e-06	0.00221919875791625
MA_119176g0010	-2.88928822282787	2.23906242670641	20.6319076487521	5.56606854591372e-06	0.00221919875791625
MA_10431021g0020	-3.72351342092837	0.648572374724621	20.2881736850339	6.66110435683073e-06	0.00262174235582953
MA_36568g0010	-4.16512608697813	0.256759084634455	20.2138106239589	6.92511702660021e-06	0.00269115307236236
MA_38978g0010	-2.16989909509218	3.02470511805014	20.186393832712	7.02508415197849e-06	0.00269587604332175
MA_10428203g0010	1.74910242247803	3.88405371566063	19.7224251865332	8.9544410016348e-06	0.00336835156042617
MA_10436276g0010	3.49724400143053	2.40791877169827	19.7133849943927	8.99689993338585e-06	0.00336835156042617
MA_5740022g0010	-1.80345512109411	4.6004188044895	19.4494071800327	1.03299896838853e-05	0.00382085160596721
MA_47191g0010	-2.32713571697444	4.25949486472211	19.2238579076248	1.16251407611848e-05	0.0042487121591473
MA_10429395g0010	3.75906063709405	1.70272464438171	19.1329198279901	1.21923681244717e-05	0.00440359648730918
MA_721447g0010	-2.91178603199899	2.9266761325587	19.0696733009904	1.26031787013092e-05	0.00445039057977671
MA_504741g0010	4.18794453649707	3.19642461646275	19.0683598164174	1.26118560404096e-05	0.00445039057977671
MA_10434153g0010	2.01513572769837	3.97964808098197	18.9251709119256	1.35947070824546e-05	0.0047426989480836
MA_207304g0010	-2.0697840272551	3.16339386169493	18.6855202954464	1.54148632917973e-05	0.00531726183211434
MA_236830g0010	-1.88709992173068	3.3506399540226	18.5468592792434	1.65778155065269e-05	0.0056548770672264
MA_48204g0010	2.62929162294568	4.5357879771405	18.5112141822564	1.6890755205478e-05	0.00569830972316677
MA_405739g0010	-3.22607554265262	0.970226891346807	18.4678299345454	1.72796571400154e-05	0.00576614645867904
MA_10426788g0030	-2.96976778990505	3.9976085070634	18.4070414263693	1.7839752121686e-05	0.00588903645307268
MA_10426528g0010	-1.92158252193103	4.61227146810886	18.3249189801199	1.86254888638258e-05	0.00608300540552609
MA_185772g0010	4.4680418960788	3.65542670291166	18.2800041243025	1.90698402104285e-05	0.00616256941537006
MA_893141g0010	-3.18125836680443	4.43271331348744	18.2230216995212	1.9648938544518e-05	0.00624555501963158
MA_8765487g0010	-2.2461029417409	2.14245026948617	18.2148412170927	1.97335126027447e-05	0.00624555501963158
MA_445978g0010	-3.10751074822338	1.30483917571231	18.0908312228065	2.10613169140103e-05	0.00659777989040935
MA_10430035g0010	-2.17171330324949	2.41768449705661	17.9188644575976	2.3052479394093e-05	0.00714859714544097
MA_507964g0010	-1.63176976266893	5.05497440477994	17.7423912325745	2.52927059316936e-05	0.00776486072102995
MA_18943g0030	-3.06947025015402	0.954229204465491	17.6382367175974	2.67162555800167e-05	0.00809879044673983
MA_693471g0020	2.76708677160323	1.59700520687782	17.6072999121606	2.71544005310772e-05	0.00809879044673983
MA_10365868g0030	2.88596240259137	2.6239213180962	17.5991033931637	2.72716895501583e-05	0.00809879044673983
MA_10426356g0010	1.82637698643211	3.35091442022577	17.5877050675564	2.74356419042652e-05	0.00809879044673983
MA_867509g0010	-1.89718668918356	3.71247661240863	17.51959742241	2.84361459311941e-05	0.00831418742940628
MA_10434202g0010	-1.30077406932756	6.91009658132011	17.4793605096698	2.90443745001691e-05	0.00841190846372822
MA_667767g0010	-2.43557419650906	2.43633103047268	17.4152179487357	3.00411161179947e-05	0.00861927350301342
MA_7477377g0010	-2.76639933949659	1.45238626207649	17.3567077355843	3.09802898399639e-05	0.00880643424154529
MA_381654g0010	-2.33771047426755	2.50234794486411	17.3233934025761	3.15281598391618e-05	0.00882711063346433
MA_110581g0010	2.71865506854104	1.36587517076705	17.3152693709952	3.16632337325018e-05	0.00882711063346433
MA_297200g0010	-2.02736081454393	3.04625967255878	17.3001829830597	3.191561173663e-05	0.00882711063346433
MA_8467692g0010	2.11815377065646	3.47101692105981	17.2623778142323	3.2556966329911e-05	0.00892409702078811
MA_10433766g0010	-1.48082696902942	5.51289514373504	17.0863151689761	3.57187576308997e-05	0.00970412264839488
MA_101691g0010	-3.00179714829654	2.60334196794552	17.0545480417108	3.63212808392608e-05	0.00978125720846761

## Sheet: down regulated
Heterobasidion parviporum (-) group versus Heterobasidion parviporum (+) group
gene	logFC	logCPM	LR	PValue	FDR
MA_10434202g0010	-1.30077406932756	6.91009658132011	17.4793605096698	2.90443745001691e-05	0.00841190846372822
MA_10433766g0010	-1.48082696902942	5.51289514373504	17.0863151689761	3.57187576308997e-05	0.00970412264839488
MA_507964g0010	-1.63176976266893	5.05497440477994	17.7423912325745	2.52927059316936e-05	0.00776486072102995
MA_874084g0010	-1.71726954828477	5.02759428423084	21.0307952184223	4.51960293034764e-06	0.00190070972550236
MA_5740022g0010	-1.80345512109411	4.6004188044895	19.4494071800327	1.03299896838853e-05	0.00382085160596721
MA_10433066g0010	-1.82232252667764	6.84806584173422	22.188949982698	2.47091815901039e-06	0.0011073003617024
MA_236830g0010	-1.88709992173068	3.3506399540226	18.5468592792434	1.65778155065269e-05	0.0056548770672264
MA_867509g0010	-1.89718668918356	3.71247661240863	17.51959742241	2.84361459311941e-05	0.00831418742940628
MA_10426528g0010	-1.92158252193103	4.61227146810886	18.3249189801199	1.86254888638258e-05	0.00608300540552609
MA_10437031g0020	-1.9845748772209	3.2177786345491	22.948010495572	1.66442379030383e-06	0.000798403286911368
MA_297200g0010	-2.02736081454393	3.04625967255878	17.3001829830597	3.191561173663e-05	0.00882711063346433
MA_207304g0010	-2.0697840272551	3.16339386169493	18.6855202954464	1.54148632917973e-05	0.00531726183211434
MA_180174g0010	-2.12634869409331	3.19100544855339	23.1294287318152	1.51454848328605e-06	0.000752999376089906
MA_38978g0010	-2.16989909509218	3.02470511805014	20.186393832712	7.02508415197849e-06	0.00269587604332175
MA_10430035g0010	-2.17171330324949	2.41768449705661	17.9188644575976	2.3052479394093e-05	0.00714859714544097
MA_161278g0010	-2.23282666149358	5.36135576656603	30.6823365720372	3.03919133876584e-08	3.11010580333705e-05
MA_91468g0010	-2.23829391130417	3.92436339610701	22.5193505542923	2.08037360559158e-06	0.000953245816293456
MA_8765487g0010	-2.2461029417409	2.14245026948617	18.2148412170927	1.97335126027447e-05	0.00624555501963158
MA_202096g0010	-2.28566608172711	3.92759735063722	23.4815484548072	1.26117524608035e-06	0.000667553104390805
MA_74233g0020	-2.29985225246847	3.29426857376855	32.462985502303	1.21484474576794e-08	1.49182934780303e-05
MA_47191g0010	-2.32713571697444	4.25949486472211	19.2238579076248	1.16251407611848e-05	0.0042487121591473
MA_381654g0010	-2.33771047426755	2.50234794486411	17.3233934025761	3.15281598391618e-05	0.00882711063346433
MA_10437031g0010	-2.34732604864329	4.10612989498074	26.0120937655548	3.39285325196807e-07	0.000212572642521265
MA_10431971g0010	-2.39454563890517	7.22671284283164	57.4354930364163	3.49247665400288e-14	3.39401040225432e-10
MA_111912g0010	-2.41040598857074	5.71419998259892	38.52126340624	5.41603806039085e-10	1.18765977467142e-06
MA_667767g0010	-2.43557419650906	2.43633103047268	17.4152179487357	3.00411161179947e-05	0.00861927350301342
MA_25670g0010	-2.57106727552019	3.48662951507022	32.0228284178305	1.5237144640835e-08	1.79915515566782e-05
MA_8594057g0010	-2.63889064303827	4.03016942512924	22.6257744482509	1.96826338974766e-06	0.00091554069795838
MA_10351800g0010	-2.75012942038851	3.43982790568634	42.0150058686114	9.05756750066824e-11	2.86703100585107e-07
MA_10436092g0030	-2.76159467277852	2.2055943371009	25.0848280967409	5.48628216352819e-07	0.000323901658500607
MA_7477377g0010	-2.76639933949659	1.45238626207649	17.3567077355843	3.09802898399639e-05	0.00880643424154529
MA_697188g0010	-2.83747275922718	3.10206403022703	29.9034902726774	4.54094669285495e-08	4.22445646880748e-05
MA_119176g0010	-2.88928822282787	2.23906242670641	20.6319076487521	5.56606854591372e-06	0.00221919875791625
MA_336019g0010	-2.8925244517471	2.72651455918266	30.1603484985802	3.97759077931142e-08	3.8160011539019e-05
MA_721447g0010	-2.91178603199899	2.9266761325587	19.0696733009904	1.26031787013092e-05	0.00445039057977671
MA_10427926g0010	-2.91338965438564	4.99669534419549	21.9976708251088	2.72981540269069e-06	0.00119721904089435
MA_443520g0010	-2.94053943500956	3.81211278737822	24.29796567333	8.25261747163528e-07	0.000460646102507642
MA_10426788g0030	-2.96976778990505	3.9976085070634	18.4070414263693	1.7839752121686e-05	0.00588903645307268
MA_101691g0010	-3.00179714829654	2.60334196794552	17.0545480417108	3.63212808392608e-05	0.00978125720846761
MA_10083891g0010	-3.04073831668003	2.81048245703639	22.7519578616959	1.84316259981152e-06	0.000870539874064826
MA_10433693g0010	-3.0495196387065	3.30050893972162	20.6412176171795	5.53906832059232e-06	0.00221919875791625
MA_18943g0030	-3.06947025015402	0.954229204465491	17.6382367175974	2.67162555800167e-05	0.00809879044673983
MA_445978g0010	-3.10751074822338	1.30483917571231	18.0908312228065	2.10613169140103e-05	0.00659777989040935
MA_893141g0010	-3.18125836680443	4.43271331348744	18.2230216995212	1.9648938544518e-05	0.00624555501963158
MA_10433003g0010	-3.220933761593	3.2365391257387	37.8170409846459	7.77000701497343e-10	1.49087009599803e-06
MA_405739g0010	-3.22607554265262	0.970226891346807	18.4678299345454	1.72796571400154e-05	0.00576614645867904
MA_10434687g0010	-3.29385630459191	3.22295906860763	23.1216152711247	1.52071535236398e-06	0.000752999376089906
MA_10434677g0010	-3.59843886298797	1.89859091679315	29.5865795597385	5.34738993971188e-08	4.82837856321044e-05
MA_10339967g0020	-3.71661858055941	2.40776549174865	33.7545861771783	6.25214758349471e-09	8.72458776424035e-06
MA_10431021g0020	-3.72351342092837	0.648572374724621	20.2881736850339	6.66110435683073e-06	0.00262174235582953
MA_10426366g0010	-3.94001155746225	1.58930377851954	24.8569767115337	6.17451729057785e-07	0.000357656001548566
MA_96165g0020	-4.1516584794439	1.56568515847932	24.0961778853651	9.16420110616397e-07	0.000502394596355775
MA_36568g0010	-4.16512608697813	0.256759084634455	20.2138106239589	6.92511702660021e-06	0.00269115307236236
MA_10433565g0010	-4.16818940380693	2.8974201105548	53.1035079448444	3.16426850183745e-13	1.9428608601282e-09
MA_10244377g0010	-4.20727781407542	2.57891657021578	37.0926232388095	1.12649074638067e-09	2.03430975964039e-06
MA_101156g0010	-4.47479583489283	0.985550548476405	30.5338997022631	3.28083290339176e-08	3.24908290755249e-05
MA_78924g0010	-4.68076131781423	0.728400488479652	24.5668275604157	7.1776776991395e-07	0.00040806426919182
MA_348108g0020	-4.72809397944736	1.99067875255968	28.0466145883727	1.18428104153391e-07	8.45521580816069e-05
MA_78924g0020	-4.94241710936507	0.950972733484947	26.3032338403187	2.91799670116729e-07	0.000186741371881228
MA_441585g0010	-5.09705816310767	1.54884356896055	40.5026749517642	1.9634705319447e-10	5.02321211089187e-07
MA_6804407g0010	-5.2928820865961	0.545234818457346	29.4287849400103	5.80095916282791e-08	5.08826989425191e-05
MA_6389744g0010	-5.62257563938624	7.22591712972335	29.3036028099661	6.18805326915877e-08	5.27703431564373e-05
MA_9441091g0010	-5.72349839508919	2.70101648387529	40.8026543502713	1.68404196771169e-10	4.70000803715899e-07
MA_490893g0010	-5.79855526797428	0.959977456069132	38.7613468598523	4.78918124840715e-10	1.13098357173923e-06
MA_329325g0010	-5.84717912766551	1.01351279982168	34.541724183265	4.17211591906341e-09	6.09923612929747e-06
MA_919071g0010	-6.47854472113958	-0.061833844511259	23.1537835444345	1.49548663030075e-06	0.000752999376089906
MA_322586g0010	-6.66543117723247	0.0704953647326095	25.7915480704832	3.80350393359534e-07	0.000233535141522754
MA_223481g0010	-6.96519849781177	0.296722317675245	28.9114936583532	7.57620197264235e-08	6.12077369895053e-05
MA_192580g0010	-7.67630253642344	0.84853759079341	26.3020837944106	2.91973480465764e-07	0.000186741371881228
MA_215209g0010	-7.70328439380746	0.922035157550602	41.9552014732519	9.33886321124126e-11	2.86703100585107e-07

## Sheet: GO down regulated
GO analysis for the down regulated genes (Heterobasidion parviporum (-) group versus Heterobasidion parviporum (+) group)
Gene	Description	Chromosome	Source	Confidence	Trinity	GO ID	Name Space	Description
MA_10083891g0010	cysteine-rich receptor kinase 2	MA_10083891	AUGUSTUS	Medium	comp96574_c6_seq12
MA_101156g0010	DJ-1 homolog B	MA_101156	AUGUSTUS	High	comp93417_c0_seq1	GO:0006486	biological_process	protein glycosylation
MA_101691g0010	amino acid permease 3-like	MA_101691	AUGUSTUS	High	comp88970_c0_seq1	GO:0006820	biological_process	anion transport
						GO:0030003	biological_process	cellular cation homeostasis
						GO:0006888	biological_process	ER to Golgi vesicle-mediated transport
						GO:0005622	cellular_component	intracellular
						GO:0006612	biological_process	protein targeting to membrane
MA_10244377g0010	LRR receptor-like serine threonine- kinase	MA_10244377	AUGUSTUS	Medium	comp93287_c1_seq6
MA_10339967g0020		MA_10339967	AUGUSTUS	Medium	NA
MA_10351800g0010		MA_10351800	AUGUSTUS	Low	NA
MA_10426366g0010	TMV resistance N-like	MA_10426366	AUGUSTUS	Medium	comp96527_c0_seq4
MA_10426528g0010	---NA---	MA_10426528	AUGUSTUS	High	comp96616_c4_seq1
MA_10426788g0030	cinnamoyl- reductase	MA_10426788	AUGUSTUS	Medium	comp94614_c1_seq3
MA_10427926g0010	receptor kinase Xa21	MA_10427926	EuGene	High	comp90087_c0_seq1	GO:0007165	biological_process	signal transduction
						GO:0005488	molecular_function	binding
						GO:0051707	biological_process	response to other organism
						GO:0016301	molecular_function	kinase activity
						GO:0045087	biological_process	innate immune response
MA_10430035g0010	expansin	MA_10430035	AUGUSTUS	Medium	comp96095_c0_seq1
MA_10431021g0020	---NA---	MA_10431021	EuGene	Medium	comp87616_c0_seq2
MA_10431971g0010	receptor kinase At3g47110	MA_10431971	AUGUSTUS	High	comp96727_c0_seq1	GO:0016740	molecular_function	transferase activity
MA_10433003g0010	TMV resistance N-like	MA_10433003	AUGUSTUS	Medium	comp96610_c0_seq1
MA_10433066g0010	cytochrome P450 71A1-like	MA_10433066	AUGUSTUS	High	comp96544_c2_seq4	GO:0046872	molecular_function	metal ion binding
						GO:0016491	molecular_function	oxidoreductase activity
MA_10433565g0010	unknown	MA_10433565	AUGUSTUS	Medium	comp96488_c0_seq1
MA_10433693g0010	Glycosyl family 2	MA_10433693	AUGUSTUS	High	comp95034_c1_seq13	GO:0016757	molecular_function	transferase activity, transferring glycosyl groups
						GO:0009058	biological_process	biosynthetic process
MA_10433766g0010	AIG1-like	MA_10433766	AUGUSTUS	High	comp96069_c1_seq14
MA_10434202g0010	40S ribosomal S2-3-like	MA_10434202	AUGUSTUS	High	comp89608_c2_seq1	GO:0005730	cellular_component	nucleolus
						GO:0005794	cellular_component	Golgi apparatus
						GO:0005886	cellular_component	plasma membrane
						GO:0009507	cellular_component	chloroplast
						GO:0003723	molecular_function	RNA binding
						GO:0005618	cellular_component	cell wall
						GO:0003735	molecular_function	structural constituent of ribosome
						GO:0006412	biological_process	translation
						GO:0001510	biological_process	RNA methylation
MA_10434677g0010	probable LRR receptor-like serine threonine- kinase At5g48740	MA_10434677	EuGene	Medium	comp96696_c0_seq10
MA_10434687g0010	receptor kinase At4g00960	MA_10434687	AUGUSTUS	High	comp95511_c2_seq9	GO:0004672	molecular_function	protein kinase activity
						GO:0016310	biological_process	phosphorylation
						GO:0016023	cellular_component	cytoplasmic membrane-bounded vesicle
MA_10436092g0030	probable LRR receptor-like serine threonine- kinase At3g47570	MA_10436092	AUGUSTUS	Medium	comp93793_c0_seq1
MA_10437031g0010	NBS-LRR disease resistance homologue	MA_10437031	AUGUSTUS	Medium	comp94962_c4_seq3
MA_10437031g0020	truncated TIR-NBS-LRR	MA_10437031	AUGUSTUS	High	comp94962_c4_seq2
MA_111912g0010	unknown	MA_111912	EuGene	High	comp95660_c1_seq39
MA_119176g0010	probable LRR receptor-like serine threonine- kinase At1g56140	MA_119176	EuGene	Medium	comp96671_c3_seq3
MA_161278g0010	receptor kinase At3g47110	MA_161278	AUGUSTUS	High	comp96726_c2_seq1	GO:0016772	molecular_function	transferase activity, transferring phosphorus-containing groups
MA_180174g0010	unknown	MA_180174	AUGUSTUS	High	comp78570_c1_seq2
MA_18943g0030	ARM repeat superfamily	MA_18943	AUGUSTUS	Medium	comp96667_c1_seq2
MA_192580g0010	probable LRR receptor-like serine threonine- kinase At1g67720	MA_192580	AUGUSTUS	Medium	comp96119_c3_seq7
MA_202096g0010	glucan endo-1,3-beta-glucosidase-like	MA_202096	AUGUSTUS	High	comp95233_c1_seq1	GO:0004553	molecular_function	hydrolase activity, hydrolyzing O-glycosyl compounds
						GO:0005618	cellular_component	cell wall
MA_207304g0010	eukaryotic translation initiation factor	MA_207304	AUGUSTUS	High	comp85963_c1_seq1
MA_215209g0010	structural maintenance of chromosomes 5	MA_215209	AUGUSTUS	Medium	comp85941_c1_seq2
MA_223481g0010	---NA---	MA_223481	AUGUSTUS	Low	NA
MA_236830g0010	probable LRR receptor-like serine threonine- kinase At5g48740	MA_236830	AUGUSTUS	High	comp95040_c3_seq14	GO:0004672	molecular_function	protein kinase activity
						GO:0016310	biological_process	phosphorylation
						GO:0016023	cellular_component	cytoplasmic membrane-bounded vesicle
MA_25670g0010	binding partner of ACD11 1 isoform X1	MA_25670	AUGUSTUS	High	comp74838_c0_seq1
MA_297200g0010	Cysteine-rich receptor kinase 2	MA_297200	AUGUSTUS	Medium	comp93203_c7_seq3
MA_322586g0010	DJ-1 homolog C	MA_322586	AUGUSTUS	High	comp93417_c0_seq1	GO:0009507	cellular_component	chloroplast
MA_329325g0010	ethylene-responsive transcription factor 2-like	MA_329325	AUGUSTUS	High	comp80805_c0_seq1
MA_336019g0010	cysteine-rich receptor kinase 42	MA_336019	AUGUSTUS	High	comp91434_c0_seq4	GO:0004672	molecular_function	protein kinase activity
						GO:0016310	biological_process	phosphorylation
MA_348108g0020	SUPPRESSOR OF npr1- CONSTITUTIVE 1-like isoform X2	MA_348108	EuGene	Medium	comp95897_c1_seq1
MA_36568g0010	TMV resistance N-like	MA_36568	AUGUSTUS	Medium	comp96649_c0_seq2
MA_381654g0010	ribonuclease H	MA_381654	EuGene	High	comp84782_c0_seq1	GO:0005488	molecular_function	binding
						GO:0004518	molecular_function	nuclease activity
MA_38978g0010	unknown	MA_38978	EuGene	High	comp95660_c1_seq45
MA_405739g0010	receptor kinase At3g47110	MA_405739	AUGUSTUS	Medium	comp96551_c4_seq8
MA_441585g0010	bifunctional epoxide hydrolase 2-like	MA_441585	AUGUSTUS	Medium	comp95847_c0_seq2
MA_443520g0010	TIR NBS LRR disease resistance	MA_443520	AUGUSTUS	High	comp91380_c0_seq2
MA_445978g0010	---NA---	MA_445978	AUGUSTUS	Medium	comp81952_c0_seq1
MA_47191g0010	patatin 2	MA_47191	AUGUSTUS	High	comp96378_c1_seq21	GO:0009536	cellular_component	plastid
MA_490893g0010	bifunctional epoxide hydrolase 2-like	MA_490893	EuGene	Medium	comp95847_c0_seq2
MA_507964g0010	cytochrome P450 704C1-like isoform X1	MA_507964	AUGUSTUS	Medium	comp96685_c4_seq1
MA_5740022g0010	TMV resistance N-like	MA_5740022	AUGUSTUS	Medium	comp93746_c0_seq1
MA_6389744g0010	---NA---	MA_6389744	AUGUSTUS	High	comp86096_c0_seq1
MA_667767g0010	double-strand break repair MRE11A-like	MA_667767	AUGUSTUS	High	comp85259_c1_seq1
MA_6804407g0010	transmembrane 208 homolog	MA_6804407	EuGene	Medium	comp90494_c0_seq1
MA_697188g0010	endoglucanase 3	MA_697188	AUGUSTUS	High	comp97292_c0_seq1	GO:0010382	biological_process	cellular cell wall macromolecule metabolic process
						GO:0004553	molecular_function	hydrolase activity, hydrolyzing O-glycosyl compounds
						GO:0005975	biological_process	carbohydrate metabolic process
MA_721447g0010	probable LRR receptor-like serine threonine- kinase At5g48740	MA_721447	AUGUSTUS	Medium	comp96119_c3_seq7
MA_74233g0020	CC-NBS-LRR resistance	MA_74233	AUGUSTUS	High	comp95459_c5_seq1
MA_7477377g0010	vesicle-associated 1-4	MA_7477377	EuGene	High	comp96578_c1_seq3	GO:0005622	cellular_component	intracellular
MA_78924g0010	cytochrome P450 734A1-like	MA_78924	AUGUSTUS	High	comp62471_c0_seq1	GO:0005506	molecular_function	iron ion binding
						GO:0065008	biological_process	regulation of biological quality
						GO:0008152	biological_process	metabolic process
						GO:0050896	biological_process	response to stimulus
						GO:0004497	molecular_function	monooxygenase activity
MA_78924g0020	cytochrome P450 72A15-like	MA_78924	AUGUSTUS	High	comp62471_c1_seq1	GO:0046872	molecular_function	metal ion binding
						GO:0016491	molecular_function	oxidoreductase activity
						GO:0016023	cellular_component	cytoplasmic membrane-bounded vesicle
MA_8594057g0010	NBS-LRR	MA_8594057	AUGUSTUS	Medium	comp96348_c2_seq2
MA_867509g0010	heavy metal transport detoxification superfamily	MA_867509	AUGUSTUS	High	comp93041_c1_seq4
MA_874084g0010	antimicrobial Gnk2-1	MA_874084	AUGUSTUS	High	comp73972_c0_seq1
MA_8765487g0010	Bifunctional inhibitor plant lipid transfer seed storage helical domain-containing	MA_8765487	AUGUSTUS	High	comp94252_c0_seq1
MA_893141g0010	2-hydroxyisoflavanone dehydratase-like	MA_893141	AUGUSTUS	High	comp91874_c6_seq1
MA_91468g0010	probable WRKY transcription factor 31	MA_91468	AUGUSTUS	High	comp93043_c0_seq7	GO:0003677	molecular_function	DNA binding
MA_919071g0010	ureidoglycolate hydrolase	MA_919071	AUGUSTUS	High	comp89021_c0_seq1	GO:0000394	biological_process	RNA splicing, via endonucleolytic cleavage and ligation
						GO:0005783	cellular_component	endoplasmic reticulum
						GO:0008237	molecular_function	metallopeptidase activity
						GO:0016023	cellular_component	cytoplasmic membrane-bounded vesicle
						GO:0009086	biological_process	methionine biosynthetic process
						GO:0006508	biological_process	proteolysis
						GO:0009536	cellular_component	plastid
MA_9441091g0010	probable LRR receptor-like serine threonine- kinase At1g05700	MA_9441091	AUGUSTUS	Medium	comp93287_c1_seq3
MA_96165g0020	---NA---	MA_96165	AUGUSTUS	Low	comp81113_c0_seq1

## Sheet: upregulated
Heterobasidion parviporum (-) group versus Heterobasidion parviporum (+) group
Gene	logFC	logCPM	LR	PValue	FDR
MA_10435930g0010	1.67073074979461	5.09644821511631	21.7812212461097	3.05576408362926e-06	0.00132129517418899
MA_10428203g0010	1.74910242247803	3.88405371566063	19.7224251865332	8.9544410016348e-06	0.00336835156042617
MA_10426356g0010	1.82637698643211	3.35091442022577	17.5877050675564	2.74356419042652e-05	0.00809879044673983
MA_10372673g0020	11.3987620031135	4.41309850762901	142.570897324213	7.29546729342509e-33	2.2397084590815e-28
MA_10434153g0010	2.01513572769837	3.97964808098197	18.9251709119256	1.35947070824546e-05	0.0047426989480836
MA_8467692g0010	2.11815377065646	3.47101692105981	17.2623778142323	3.2556966329911e-05	0.00892409702078811
MA_670512g0010	2.26472359473741	4.6689592271715	38.3711944581221	5.84893934606608e-10	1.19708291949486e-06
MA_10426104g0010	2.44152242803506	2.16973418542231	20.848755225121	4.9701515891356e-06	0.00203444871715284
MA_49332g0010	2.47631381566109	4.40333072067325	27.3817619052677	1.66998832842537e-07	0.000116519640187861
MA_234217g0010	2.60620051621796	2.81102678287275	27.0895997898792	1.94240136713591e-07	0.000129634178197983
MA_48204g0010	2.62929162294568	4.5357879771405	18.5112141822564	1.6890755205478e-05	0.00569830972316677
MA_10426120g0010	2.71608039422062	3.99260605966495	31.9158358393047	1.60999242029663e-08	1.80015668714759e-05
MA_110581g0010	2.71865506854104	1.36587517076705	17.3152693709952	3.16632337325018e-05	0.00882711063346433
MA_10426918g0010	2.76464936893636	4.45973266621629	23.1371116023331	1.50850914209774e-06	0.000752999376089906
MA_693471g0020	2.76708677160323	1.59700520687782	17.6072999121606	2.71544005310772e-05	0.00809879044673983
MA_10365868g0030	2.88596240259137	2.6239213180962	17.5991033931637	2.72716895501583e-05	0.00809879044673983
MA_599577g0010	2.92493894067242	2.29407515605227	21.4036353593469	3.72065054272236e-06	0.00158644405085523
MA_135684g0020	2.97755474871079	4.3322694119258	56.9713101986181	4.42216339055937e-14	3.39401040225432e-10
MA_10172523g0010	3.04450851810755	1.45086373896332	23.045685998451	1.58197076932922e-06	0.000770896866958843
MA_23704g0010	3.10510146168793	5.22330172652734	28.4509686661059	9.61016721460281e-08	7.37580333720766e-05
MA_76403g0010	3.15111785850015	1.03006765186467	22.1751669659937	2.4887206826536e-06	0.0011073003617024
MA_10045883g0010	3.19043841752591	3.46889787596221	25.3122030753721	4.87614055210511e-07	0.000293524539116916
MA_10436276g0010	3.49724400143053	2.40791877169827	19.7133849943927	8.99689993338585e-06	0.00336835156042617
MA_625682g0010	3.51179953625944	3.28951420408892	31.8777912121127	1.64183671791963e-08	1.80015668714759e-05
MA_10436687g0010	3.64232956308426	5.93277991289548	28.7917450365616	8.05938932115233e-08	6.34418595280453e-05
MA_10429395g0010	3.75906063709405	1.70272464438171	19.1329198279901	1.21923681244717e-05	0.00440359648730918
MA_10436323g0020	4.03366074647347	3.52177460842281	42.2023240256202	8.23021549769182e-11	2.86703100585107e-07
MA_10432620g0010	4.11491532679031	1.88855122774472	32.7935767787884	1.02482920409201e-08	1.31092735690103e-05
MA_504741g0010	4.18794453649707	3.19642461646275	19.0683598164174	1.26118560404096e-05	0.00445039057977671
MA_10435323g0010	4.20326538677637	3.60275129495781	28.237290278667	1.07316986934795e-07	7.96454820056975e-05
MA_178006g0010	4.20506979391669	2.33350825622597	34.8467215124903	3.56709721929208e-09	5.47549423161334e-06
MA_10433867g0010	4.40402412065871	1.75109611891665	20.8667356236862	4.92371338241729e-06	0.00203444871715284
MA_185772g0010	4.4680418960788	3.65542670291166	18.2800041243025	1.90698402104285e-05	0.00616256941537006
MA_257487g0010	4.60977503433319	1.02444377140359	23.484371457157	1.25932604149272e-06	0.000667553104390805
MA_23704g0020	4.77216694912992	2.68467972132018	35.5140635824013	2.53215739856862e-09	4.31873511866981e-06
MA_120047g0010	4.79588341903965	3.36602646812838	46.3613287363653	9.83372920945495e-12	4.31279266757524e-08
MA_10386825g0010	4.9156647624097	2.40456426670419	52.2323069120789	4.93082086467183e-13	2.52293667575709e-09
MA_10313797g0010	5.27756084890567	1.05569992513996	31.7728841604454	1.73295321791225e-08	1.83454013068642e-05
MA_11549g0010	5.42752124219419	2.6089295846147	33.1507294959139	8.5284372832074e-09	1.13836097649768e-05
MA_469821g0010	6.75062015321784	0.0912938921311846	27.1574241389392	1.87543613461507e-07	0.000127946420739295
MA_10334249g0030	6.87423810699392	0.193473423038995	29.0044313794741	7.22129189429486e-08	5.99172057175277e-05
MA_10381936g0010	7.07973829297994	4.67119604048145	139.950653430743	2.72900738305084e-32	4.18902633298305e-28
MA_10362105g0020	7.32637808944331	0.532010800162602	28.2078590471204	1.08961245740694e-07	7.96454820056975e-05
MA_8772982g0010	7.44757432525649	0.668851558900678	35.0994607882285	3.13287533551438e-09	5.06206698948902e-06

## Sheet: GO up regulated
GO analysis for the up regulated genes (Heterobasidion parviporum (-) group versus Heterobasidion parviporum (+) group)
Gene	Description	Chromosome	Source	Confidence	Trinity			GO ID	Name Space	Description
MA_10045883g0010	diacylglycerol kinase theta	MA_10045883	AUGUSTUS	High	comp94181_c0_seq1			NA
MA_10172523g0010	UDP-glucosyltransferase family	MA_10172523	AUGUSTUS	Medium	comp96593_c2_seq2			NA
MA_10313797g0010		MA_10313797	AUGUSTUS	Low	NA			NA
MA_10334249g0030		MA_10334249	AUGUSTUS	Low	NA			NA
MA_10362105g0020		MA_10362105	AUGUSTUS	Low	NA			NA
MA_10365868g0030		MA_10365868	AUGUSTUS	Low	comp453680_c0_seq1			NA
MA_10372673g0020		MA_10372673	AUGUSTUS	Low	NA			NA
MA_10381936g0010		MA_10381936	AUGUSTUS	Low	NA			NA
MA_10386825g0010		MA_10386825	AUGUSTUS	Low	NA			NA
MA_10426104g0010	tau class glutathione S-transferase	MA_10426104	AUGUSTUS	High	comp93472_c1_seq5			NA
MA_10426120g0010	diacylglycerol kinase theta	MA_10426120	AUGUSTUS	High	comp94181_c0_seq1			NA
MA_10426356g0010	probable LRR receptor-like serine threonine- kinase At1g67720 isoform X2	MA_10426356	AUGUSTUS	Medium	comp96241_c2_seq2
MA_10426918g0010	disease resistance (TIR-NBS-LRR class)	MA_10426918	AUGUSTUS	Medium	comp96645_c0_seq3
MA_10428203g0010	60S ribosomal L7-2-like	MA_10428203	AUGUSTUS	High	comp49783_c1_seq1			GO:0005794	cellular_component	Golgi apparatus
								GO:0005886	cellular_component	plasma membrane
								GO:0009507	cellular_component	chloroplast
								GO:0005618	cellular_component	cell wall
								GO:0003735	molecular_function	structural constituent of ribosome
								GO:0006412	biological_process	translation
MA_10429395g0010	TMV resistance N-like	MA_10429395	EuGene	Medium	comp96730_c0_seq1
MA_10432620g0010	probable disease resistance At5g63020	MA_10432620	EuGene	Medium	comp85961_c2_seq2
MA_10433867g0010	---NA---	MA_10433867	AUGUSTUS	Low	NA
MA_10434153g0010	probable xyloglucan endotransglucosylase hydrolase B	MA_10434153	AUGUSTUS	High	comp85882_c0_seq3			GO:0048046	cellular_component	apoplast
								GO:0016762	molecular_function	xyloglucan:xyloglucosyl transferase activity
								GO:0006073	biological_process	cellular glucan metabolic process
								GO:0004553	molecular_function	hydrolase activity, hydrolyzing O-glycosyl compounds
								GO:0005618	cellular_component	cell wall
MA_10435323g0010	10 kDa chaperonin-like	MA_10435323	AUGUSTUS	High	comp71986_c0_seq1			GO:0006457	biological_process	protein folding
								GO:0005739	cellular_component	mitochondrion
								GO:0005507	molecular_function	copper ion binding
								GO:0051087	molecular_function	chaperone binding
MA_10435930g0010	calcium-dependent kinase 17	MA_10435930	AUGUSTUS	Medium	comp95240_c0_seq1
MA_10436276g0010	7-deoxyloganetin glucosyltransferase-like	MA_10436276	AUGUSTUS	High	comp94013_c2_seq1
MA_10436323g0020	disease resistance RPP13 4	MA_10436323	AUGUSTUS	High	comp85961_c1_seq2
MA_10436687g0010	cellulose synthase E6	MA_10436687	AUGUSTUS	High	comp96640_c3_seq1			GO:0016740	molecular_function	transferase activity
MA_110581g0010	metal-nicotianamine transporter YSL3	MA_110581	AUGUSTUS	High	comp91712_c1_seq1			GO:0046872	molecular_function	metal ion binding
								GO:0005886	cellular_component	plasma membrane
								GO:0006857	biological_process	oligopeptide transport
MA_11549g0010	probable LRR receptor-like serine threonine- kinase At3g47570	MA_11549	EuGene	High	comp96726_c2_seq1			GO:0016772	molecular_function	transferase activity, transferring phosphorus-containing groups
MA_120047g0010	aspartic ase nepenthesin-1	MA_120047	EuGene	High	comp92243_c0_seq1			GO:0043170	biological_process	macromolecule metabolic process
								GO:0044238	biological_process	primary metabolic process
MA_135684g0020	neutral ceramidase-like	MA_135684	AUGUSTUS	Medium	comp93725_c0_seq1
MA_178006g0010	BURP domain RD22-like	MA_178006	AUGUSTUS	High	comp75759_c0_seq1
MA_185772g0010	BURP domain RD22	MA_185772	AUGUSTUS	High	comp86910_c0_seq1
MA_234217g0010	probable LRR receptor-like serine threonine- kinase At5g48740	MA_234217	AUGUSTUS	Medium	comp96119_c3_seq7
MA_23704g0010	dihydroflavonol 4-reductase	MA_23704	AUGUSTUS	High	comp71818_c1_seq1
MA_23704g0020	---NA---	MA_23704	AUGUSTUS	Low	comp79809_c0_seq2
MA_257487g0010	---NA---	MA_257487	AUGUSTUS	Medium	comp95285_c0_seq6
MA_469821g0010	---NA---	MA_469821	AUGUSTUS	Low	NA
MA_48204g0010	PREDICTED: uncharacterized protein LOC107410419	MA_48204	EuGene	Medium	comp73637_c0_seq2
MA_49332g0010	UDP-glycosyltransferase 74E2-like	MA_49332	AUGUSTUS	High	comp95236_c1_seq2			GO:0016758	molecular_function	transferase activity, transferring hexosyl groups
MA_504741g0010	probable LRR receptor-like serine threonine- kinase At1g05700	MA_504741	AUGUSTUS	Medium	comp96448_c1_seq2
MA_599577g0010	---NA---	MA_599577	AUGUSTUS	High	comp96397_c2_seq7
MA_625682g0010	UDP-glycosyltransferase 74E2-like	MA_625682	AUGUSTUS	High	comp93819_c0_seq4			GO:0016757	molecular_function	transferase activity, transferring glycosyl groups
MA_670512g0010	basic leucine zipper and W2 domain-containing 2-like	MA_670512	EuGene	Medium	comp42794_c0_seq1
MA_693471g0020	---NA---	MA_693471	EuGene	Medium	comp96730_c0_seq1
MA_76403g0010	---NA---	MA_76403	AUGUSTUS	High	comp86054_c0_seq1
MA_8467692g0010	kDa class I heat shock -like	MA_8467692	AUGUSTUS	Medium	comp88170_c1_seq1
MA_8772982g0010	receptor 12	MA_8772982	EuGene	High	comp96417_c2_seq6

## Sheet: GO figures heterobasidion
High_low under heterobasidion				Functional groups of up and down regulated Heterobasisidion genes expressed between the high and low water groups
Biological functions															Fig X: Functional groups of Heterobasidion genes during infection establishment on Norway spruce trees with a minimum of on. GO terms in the up and down regulated groups in A. Biological process, B. Molecular functions and C. cellular components
	Upregulated
cellular glucan metabolic process	1
macromolecule metabolic process	1
oligopeptide transport	1
primary metabolic process	1
protein folding	1
translation	1
	Downregulated
anion transport	1
biosynthetic process	1
carbohydrate metabolic process	1
cellular cation homeostasis	1
cellular cell wall macromolecule metabolic process	1
ER to Golgi vesicle-mediated transport	1
innate immune response	1
metabolic process	1
methionine biosynthetic process	1
protein glycosylation	1
protein targeting to membrane	1
proteolysis	1
regulation of biological quality	1
response to other organism	1
response to stimulus	1
RNA methylation	1
RNA splicing, via endonucleolytic cleavage and ligation	1
signal transduction	1
translation	1
phosphorylation	3
					GO terms in the category "Biological process" expressed in the up and down regulated genes with a minimum of one hit
Molecular functions
	Upregulated
chaperone binding	1
copper ion binding	1
hydrolase activity, hydrolyzing O-glycosyl compounds	1
metal ion binding	1
structural constituent of ribosome	1
transferase activity	5
	Downregulated
DNA binding	1
iron ion binding	1
kinase activity	1
metallopeptidase activity	1
monooxygenase activity	1
nuclease activity	1
RNA binding	1
structural constituent of ribosome	1
binding	2
hydrolase activity, hydrolyzing O-glycosyl compounds	2
metal ion binding	2
oxidoreductase activity	2
protein kinase activity	3
transferase activity	3
					GO terms in the category "Molecular function" expressed in the up and down regulated genes with a minimum of one hit
Cellular component
	Upregulated
apoplast	1
chloroplast	1
Golgi apparatus	1
mitochondrion	1
cell wall	2
plasma membrane	2
	Downregulated
endoplasmic reticulum	1
Golgi apparatus	1
nucleolus	1
plasma membrane	1
cell wall	2
chloroplast	2
intracellular	2
plastid	2
cytoplasmic membrane-bounded vesicle	4
					GO terms in the category "Cellular component" expressed in the up and down regulated genes with a minimum of one hit

## Sheet: Heterobasidion (-) group
Exlusively in HETEROBASIDION parviporum (-) group
DOWN regulated				UP regulated
MA_5534226g0010				MA_18829g0010
MA_120697g0010				MA_21130g0010
MA_10427673g0010				MA_442130g0010
MA_10427673g0020				MA_184317g0010
MA_10434988g0010				MA_10434030g0010
MA_10433090g0010				MA_12201g0010
MA_105240g0010				MA_102132g0010
MA_788921g0010				MA_10436803g0010
MA_796805g0010				MA_79708g0010
MA_130918g0010				MA_93746g0010
MA_10025310g0010				MA_471976g0010
MA_531014g0010				MA_875075g0010
MA_10432865g0020				MA_133842g0010
MA_15892g0010				MA_24774g0010
MA_10175544g0010				MA_3117g0010
MA_15892g0020				MA_10433000g0020
MA_10434197g0020				MA_10393847g0010
MA_10430110g0020				MA_96649g0010
MA_11051g0010				MA_10436033g0010
MA_291092g0010				MA_33275g0010
MA_10427683g0010				MA_43044g0010
MA_100931g0020				MA_10135529g0010
MA_10353878g0010				MA_41964g0010
MA_95800g0010				MA_77993g0010
MA_10436069g0010				MA_239048g0010
MA_137109g0010				MA_34351g0010
MA_10425982g0010				MA_130334g0010
MA_158072g0010				MA_126451g0010
MA_556337g0010				MA_9035900g0010
MA_3550g0020				MA_10436687g0010
MA_10429698g0010				MA_175978g0010
MA_77606g0010				MA_38922g0010
MA_30903g0010				MA_10433483g0010
MA_10434827g0010				MA_10430846g0010
MA_631506g0010				MA_204527g0010
MA_2588g0010				MA_86162g0020
MA_46121g0010				MA_188576g0010
MA_10429398g0010				MA_10426928g0010
MA_243g0020				MA_182690g0010
MA_10430064g0010				MA_6570g0010
MA_119176g0010				MA_9472752g0010
MA_134886g0010				MA_26630g0010
MA_10339234g0030				MA_10436974g0020
MA_495151g0010				MA_139905g0010
MA_592495g0010				MA_773426g0010
MA_105092g0010				MA_41308g0010
MA_10306785g0010				MA_245237g0010
MA_579682g0010				MA_7016698g0010
MA_222685g0010				MA_10436211g0010
MA_297324g0010				MA_29913g0010
MA_10433066g0010				MA_34981g0010
MA_10335177g0010				MA_413668g0010
MA_10433294g0010				MA_95739g0010
MA_161278g0010				MA_10426786g0020
MA_15852g0010				MA_10267304g0010
MA_379011g0010				MA_10426614g0020
MA_10427033g0010				MA_483877g0010
MA_138618g0010				MA_18369g0010
MA_206115g0010				MA_5874579g0010
MA_10432037g0010				MA_4491635g0010
MA_82642g0010				MA_110169g0010
MA_10020141g0010				MA_10430846g0020
MA_665339g0010				MA_568538g0010
MA_286272g0010				MA_10313989g0010
MA_180458g0010				MA_10436974g0010
MA_492535g0010				MA_8963386g0010
MA_323796g0010				MA_10426104g0010
MA_8158336g0010				MA_10426002g0020
MA_6455559g0010				MA_10426614g0010
MA_921174g0010				MA_10436731g0030
MA_19018g0010				MA_665331g0010
MA_23239g0010				MA_10427910g0010
MA_57932g0010				MA_24508g0010
MA_10434958g0010				MA_168928g0010
MA_10431230g0010				MA_10433986g0020
MA_180174g0010				MA_95995g0010
MA_103616g0010				MA_262554g0010
MA_10426545g0020				MA_372983g0010
MA_10435352g0010				MA_10382339g0010
MA_310012g0010				MA_673728g0010
MA_140203g0010				MA_177954g0010
MA_10426953g0010				MA_10352495g0010
MA_10427204g0010				MA_14707g0010
MA_10435757g0010				MA_10427474g0010
MA_136411g0010				MA_10196363g0010
MA_89828g0010				MA_10291578g0010
MA_489238g0010				MA_223085g0010
MA_42031g0010				MA_670512g0010
MA_85988g0010				MA_8281887g0010
MA_10426411g0010				MA_8467692g0010
MA_10434687g0010				MA_104806g0010
MA_10432629g0020				MA_9668286g0010
MA_89176g0010				MA_10432788g0010
MA_8135787g0010				MA_10433311g0020
MA_10426545g0010				MA_7001519g0010
MA_10391035g0010				MA_8389610g0010
MA_10431378g0010				MA_135684g0020
MA_101024g0010				MA_9551351g0010
MA_79244g0010				MA_447480g0010
MA_9255g0010				MA_320320g0010
MA_14977g0010				MA_225419g0010
MA_10432110g0010				MA_124714g0010
MA_10434912g0020				MA_222427g0010
MA_482771g0010				MA_10436544g0020
MA_402760g0010				MA_10427886g0020
MA_10432594g0010				MA_94546g0010
MA_199561g0010				MA_20700g0010
MA_86300g0010				MA_190560g0010
MA_9917746g0010				MA_212053g0010
MA_166604g0010				MA_26069g0010
MA_10433500g0010				MA_185772g0010
MA_134669g0010				MA_183573g0010
MA_910351g0010				MA_105932g0010
MA_10436878g0010				MA_10435880g0030
MA_438173g0010				MA_7766880g0010
MA_9232034g0010				MA_605776g0010
MA_5804213g0010				MA_143311g0010
MA_530154g0010				MA_10429519g0010
MA_11527g0010				MA_7125630g0010
MA_667767g0010				MA_9957372g0010
MA_490893g0010				MA_15657g0010
MA_13470g0010				MA_86473g0010
MA_241801g0010				MA_29449g0010
MA_65398g0010				MA_504741g0010
MA_134492g0010				MA_145059g0010
MA_913477g0010				MA_318438g0010
MA_427242g0010				MA_522798g0010
MA_266173g0010				MA_79011g0010
MA_10274g0010				MA_27017g0010
MA_1421g0010
MA_6753815g0010
MA_8967171g0010
MA_116760g0010
MA_121533g0010
MA_10428419g0010
MA_9910710g0010
MA_10099693g0010
MA_10429075g0020
MA_125608g0010
MA_19927g0010
MA_10432693g0030
MA_110462g0010
MA_185082g0010
MA_93151g0010
MA_369117g0010
MA_216719g0010
MA_1054190g0010
MA_10433786g0010
MA_35821g0010
MA_10436019g0020
MA_10435326g0010
MA_20764g0010
MA_58143g0010
MA_10431998g0010
MA_54954g0010
MA_141996g0010
MA_138828g0010
MA_7104g0020
MA_10436591g0010
MA_6208853g0010
MA_55379g0010
MA_102072g0010
MA_132857g0010
MA_15792g0010
MA_387252g0010
MA_101156g0010
MA_9396827g0010
MA_82407g0010
MA_10321205g0010
MA_10050914g0010
MA_10373253g0010
MA_370618g0010
MA_10426738g0010
MA_9094216g0010
MA_119164g0010
MA_578029g0010
MA_10427514g0010
MA_4547g0010
MA_10436774g0010
MA_358570g0010
MA_8550743g0010
MA_10276408g0010
MA_10435707g0020
MA_31969g0010
MA_877538g0010
MA_215209g0010
MA_10431299g0010
MA_10435055g0010
MA_938243g0010
MA_415017g0010
MA_10047384g0010
MA_7378973g0010
MA_11052g0010
MA_10171186g0010
MA_35632g0010
MA_363177g0010
MA_10430777g0010
MA_9905g0010
MA_12782g0010
MA_70249g0010
MA_203441g0010
MA_500338g0010
MA_10426441g0010
MA_71201g0010
MA_8757791g0010
MA_9013544g0010
MA_209645g0010
MA_10426889g0010
MA_8180539g0010
MA_10431299g0020
MA_19161g0020
MA_23562g0010
MA_10435525g0010
MA_95715g0010
MA_80965g0010
MA_8876374g0010
MA_441585g0010
MA_9333705g0010
MA_10426936g0010
MA_20113g0010
MA_96165g0020
MA_73080g0010
MA_394599g0010
MA_929585g0010
MA_90677g0010
MA_520150g0010
MA_322586g0010
MA_88828g0010
MA_1844g0010
MA_10429037g0010
MA_128094g0010
MA_442695g0010
MA_20468g0010
MA_334338g0010
MA_331330g0010
MA_10433003g0010
MA_6676799g0010
MA_89979g0010
MA_10151149g0010
MA_91339g0010
MA_10430254g0010
MA_10432594g0020
MA_10430381g0010
MA_1877g0010
MA_421737g0010
MA_6160451g0010
MA_10430878g0010
MA_329325g0010
MA_10427792g0010
MA_47307g0010
MA_78267g0010
MA_10164180g0030
MA_10427690g0010
MA_129574g0010
MA_10427096g0010
MA_83446g0010
MA_445017g0010
MA_10055167g0010
MA_10432757g0010
MA_927067g0010
MA_10437227g0020
MA_45568g0010
MA_348108g0020
MA_6804407g0010
MA_170055g0010
MA_10164180g0020
MA_10434031g0010
MA_56806g0010
MA_633407g0010
MA_61359g0010
MA_10432413g0020
MA_697188g0010
MA_386438g0010
MA_331881g0010
MA_454606g0010
MA_34653g0010
MA_9275113g0010
MA_9412363g0010
MA_38740g0010
MA_73565g0010
MA_20117g0010
MA_9848062g0010
MA_10430728g0010
MA_9998439g0010
MA_10030456g0010
MA_28098g0010
MA_10436984g0050
MA_604159g0010
MA_166390g0010
MA_459474g0010
MA_5979847g0010
MA_10426719g0010
MA_8317372g0010
MA_7569g0010
MA_78155g0010
MA_54077g0010
MA_36141g0010
MA_152325g0010
MA_588952g0010
MA_188810g0010
MA_10426249g0010
MA_762g0010
MA_75861g0010
MA_10435107g0010
MA_9363g0010
MA_15687g0010
MA_10372207g0010
MA_14604g0010
MA_10318563g0010
MA_37162g0010
MA_26170g0010
MA_181500g0010
MA_653314g0010
MA_10428793g0010
MA_10434729g0020
MA_214498g0010
MA_66199g0010
MA_475809g0010
MA_10435536g0010
MA_41212g0010
MA_501572g0010
MA_860637g0010
MA_101958g0010
MA_274211g0010
MA_101793g0010
MA_10434351g0010
MA_7807819g0010
MA_10434201g0010
MA_19953g0020
MA_69735g0010
MA_10435706g0010
MA_63089g0010
MA_175750g0010
MA_362166g0010
MA_75520g0010
MA_10061449g0010
MA_138671g0010

## Sheet: GO Upregulated (-) group
	Gene	Description	Chromosome	Source	Confidence	Trinity	GO ID	Name space	Description		Summary of GO Slims
1	MA_10135529g0010	unknown	MA_10135529	AUGUSTUS	Medium	comp75837_c0_seq1	NA				Functional Enrichment analysis GO- biological process
2	MA_10196363g0010	(-)-beta-phellandrene synthase	MA_10196363	AUGUSTUS	High	comp95916_c1_seq12	NA				GO id	Pval (corrected)	Statistics	Description
3	MA_102132g0010	serine threonine- kinase yrzF	MA_102132	EuGene	High	comp51107_c0_seq1	GO:0005739	cellular_component	mitochondrion		GO:0009642	1.054e-09	11/66 | 156/28109	response to light intensity
4	MA_10267304g0010	unknown	MA_10267304	EuGene	Medium	comp97197_c0_seq1	NA				GO:0009408	1.054e-09	10/66 | 156/28109	response to heat
5	MA_10291578g0010	kDa class I heat shock -like	MA_10291578	AUGUSTUS	High	comp94777_c3_seq6	NA				GO:0009644	2.571e-09	11/66 | 126/28109	response to high light intensity
6	MA_10313989g0010	kDa class I heat shock -like	MA_10313989	EuGene	High	comp88170_c1_seq1	NA				GO:0006979	3.178e-09	12/66 | 329/28109	response to oxidative stress
7	MA_10352495g0010	unknown	MA_10352495	AUGUSTUS	High	comp90981_c2_seq2	NA				GO:0000302	4.517e-09	11/66 | 198/28109	response to reactive oxygen species
8	MA_10382339g0010	RNA polymerase sigma factor sigA	MA_10382339	AUGUSTUS	Medium	comp94694_c0_seq2	NA				GO:0006457	4.815e-09	11/66 | 203/28109	protein folding
9	MA_10393847g0010	mediator of RNA polymerase II transcription subunit 37c	MA_10393847	AUGUSTUS	Medium	comp89746_c0_seq1	NA				GO:0042542	5.555e-09	11/66 | 146/28109	response to hydrogen peroxide
10	MA_10426002g0020	ras-related RABH1b	MA_10426002	AUGUSTUS	Medium	comp39829_c0_seq1	NA				GO:0010035	1.518e-08	15/66 | 759/28109	response to inorganic substance
11	MA_10426104g0010	tau class glutathione S-transferase	MA_10426104	AUGUSTUS	High	comp93472_c1_seq5	NA				GO:0009266	1.134e-07	12/66 | 495/28109	response to temperature stimulus
12	MA_10426614g0010	kDa class I heat shock -like	MA_10426614	AUGUSTUS	High	comp94777_c3_seq5	NA				GO:0010286	1.373e-06	5/66 | 36/28109	heat acclimation
13	MA_10426614g0020	kDa class I heat shock	MA_10426614	EuGene	High	comp94777_c3_seq6	GO:0006457	biological_process	protein folding		GO:0009416	1.547e-05	11/66 | 640/28109	response to light stimulus
14	MA_10426786g0020	probable NAD(P)H dehydrogenase (quinone) FQR1-like 1	MA_10426786	EuGene	Medium	comp91531_c0_seq6	NA				GO:0009314	2.216e-05	11/66 | 675/28109	response to radiation
15	MA_10426928g0010	small heat-shock	MA_10426928	AUGUSTUS	High	comp94776_c0_seq12	NA				GO:0006950	2.244e-05	19/66 | 2201/28109	response to stress
16	MA_10427474g0010	thioredoxin H4-1	MA_10427474	EuGene	Medium	comp75694_c0_seq1	NA				GO:1901700	6.022e-05	14/66 | 1284/28109	response to oxygen-containing compound
17	MA_10427886g0020	unknown	MA_10427886	AUGUSTUS	High	comp94040_c2_seq13	NA				GO:0009628	0.0007146	14/66 | 1602/28109	response to abiotic stimulus
18	MA_10427910g0010	kDa class I heat shock -like	MA_10427910	AUGUSTUS	Medium	comp94777_c3_seq6	NA				GO:0050896	0.0007912	23/66 | 3981/28109	response to stimulus
19	MA_10429519g0010	probable disease resistance At4g33300	MA_10429519	AUGUSTUS	High	comp48975_c0_seq1	NA				GO:0042221	0.001585	16/66 | 2226/28109	response to chemical stimulus
20	MA_10430846g0010	---NA---	MA_10430846	AUGUSTUS	High	comp93259_c1_seq4	NA				GO:0044267	0.0103	12/66 | 1590/28109	cellular protein metabolic process
21	MA_10430846g0020	IQ EF-hand binding site	MA_10430846	AUGUSTUS	High	comp93259_c1_seq1	NA				GO:0034976	0.03032	4/66 | 183/28109	response to endoplasmic reticulum stress
22	MA_10432788g0010	kDa class I heat shock -like	MA_10432788	AUGUSTUS	Medium	comp93751_c0_seq2	NA
23	MA_10433000g0020	delta-aminolevulinic acid dehydratase chloroplastic-like	MA_10433000	AUGUSTUS	High	comp92862_c0_seq1	GO:0015995	biological_process	chlorophyll biosynthetic process
							GO:0006364	biological_process	rRNA processing
							GO:0046872	molecular_function	metal ion binding
							GO:0004655	molecular_function	porphobilinogen synthase activity
							GO:0006098	biological_process	pentose-phosphate shunt
24	MA_10433311g0020	RING-H2 finger ATL46-like	MA_10433311	EuGene	Medium	comp95943_c4_seq2	NA
25	MA_10433483g0010	heat shock 70 kDa	MA_10433483	AUGUSTUS	High	comp89746_c0_seq1	GO:0005524	molecular_function	ATP binding
							GO:0055114	biological_process	oxidation-reduction process
							GO:0006950	biological_process	response to stress
26	MA_10433986g0020	unknown	MA_10433986	AUGUSTUS	High	comp88919_c0_seq2	NA
27	MA_10434030g0010	heat shock 83	MA_10434030	AUGUSTUS	High	comp95664_c1_seq1	GO:0006457	biological_process	protein folding
							GO:0005524	molecular_function	ATP binding
							GO:0051082	molecular_function	unfolded protein binding
							GO:0005886	cellular_component	plasma membrane
							GO:0005618	cellular_component	cell wall
28	MA_10435880g0030	Golgi apparatus membrane ECHIDNA isoform X2	MA_10435880	AUGUSTUS	High	comp87769_c0_seq1	GO:0007030	biological_process	Golgi organization
							GO:0005794	cellular_component	Golgi apparatus
							GO:0016023	cellular_component	cytoplasmic membrane-bounded vesicle
							GO:0016020	cellular_component	membrane
29	MA_10436033g0010	heat shock 70 kDa 8	MA_10436033	AUGUSTUS	High	comp85492_c0_seq1	GO:0006457	biological_process	protein folding
							GO:0000166	molecular_function	nucleotide binding
							GO:0016491	molecular_function	oxidoreductase activity
30	MA_10436211g0010	kDa class III heat shock	MA_10436211	AUGUSTUS	High	comp86688_c0_seq1	NA
31	MA_10436544g0020	Heat shock 70 kDa	MA_10436544	AUGUSTUS	High	comp95979_c0_seq2	GO:0004672	molecular_function	protein kinase activity
							GO:0000166	molecular_function	nucleotide binding
							GO:0016491	molecular_function	oxidoreductase activity
							GO:0008152	biological_process	metabolic process
32	MA_10436687g0010	cellulose synthase E6	MA_10436687	AUGUSTUS	High	comp96640_c3_seq1	GO:0016740	molecular_function	transferase activity
33	MA_10436731g0030	truncated TIR-NBS-LRR	MA_10436731	EuGene	Medium	comp95312_c0_seq2	NA
34	MA_10436803g0010	probable disease resistance At1g12280	MA_10436803	AUGUSTUS	Medium	comp93311_c0_seq1	NA
35	MA_10436974g0010	small heat shock chloroplastic	MA_10436974	AUGUSTUS	High	comp92738_c0_seq2	GO:0006457	biological_process	protein folding
							GO:0009507	cellular_component	chloroplast
36	MA_10436974g0020	heat shock HSP26	MA_10436974	AUGUSTUS	High	comp85155_c0_seq1	NA
37	MA_104806g0010	kDa class I heat shock -like	MA_104806	EuGene	High	comp77813_c0_seq1	NA
38	MA_105932g0010	kDa class IV heat shock -like	MA_105932	AUGUSTUS	High	comp67583_c0_seq1	GO:0006457	biological_process	protein folding
							GO:0005783	cellular_component	endoplasmic reticulum
39	MA_110169g0010	chaperone domain	MA_110169	AUGUSTUS	High	comp80498_c0_seq1	NA
40	MA_12201g0010	photosystem II core complex s chloroplastic-like	MA_12201	AUGUSTUS	High	comp80661_c0_seq1	GO:0016020	cellular_component	membrane
							GO:0009536	cellular_component	plastid
41	MA_124714g0010	uncharacterized oxidoreductase At4g09670	MA_124714	AUGUSTUS	High	comp93139_c0_seq2	GO:0000166	molecular_function	nucleotide binding
							GO:0016491	molecular_function	oxidoreductase activity
							GO:0055114	biological_process	oxidation-reduction process
42	MA_126451g0010	unknown	MA_126451	AUGUSTUS	High	comp91250_c0_seq1	NA
43	MA_130334g0010	---NA---	MA_130334	AUGUSTUS	High	comp85360_c0_seq1	NA
44	MA_133842g0010		MA_133842	AUGUSTUS	High	comp96978_c0_seq1	NA
45	MA_135684g0020	neutral ceramidase-like	MA_135684	AUGUSTUS	Medium	comp93725_c0_seq1	NA
46	MA_139905g0010	OPI10 homolog	MA_139905	AUGUSTUS	High	comp79844_c0_seq1	GO:0006457	biological_process	protein folding
47	MA_143311g0010	disease resistance (TIR-NBS-LRR class)	MA_143311	AUGUSTUS	Medium	comp96731_c2_seq2	NA
48	MA_145059g0010	dirigent	MA_145059	EuGene	High	comp90754_c2_seq2	NA
49	MA_14707g0010	ATP-dependent zinc metalloprotease FTSH chloroplastic	MA_14707	AUGUSTUS	High	comp94630_c0_seq1	GO:0051301	biological_process	cell division
							GO:0006364	biological_process	rRNA processing
							GO:0004222	molecular_function	metalloendopeptidase activity
							GO:0005524	molecular_function	ATP binding
							GO:0016021	cellular_component	integral to membrane
							GO:0004176	molecular_function	ATP-dependent peptidase activity
							GO:0006508	biological_process	proteolysis
							GO:0008270	molecular_function	zinc ion binding
							GO:0006098	biological_process	pentose-phosphate shunt
50	MA_15657g0010	chaperone dnaJ chloroplastic	MA_15657	AUGUSTUS	High	comp95821_c2_seq4	GO:0005634	cellular_component	nucleus
							GO:0009536	cellular_component	plastid
							GO:0006950	biological_process	response to stress
51	MA_168928g0010	PWWP domain	MA_168928	AUGUSTUS	Medium	comp64779_c0_seq1	NA
52	MA_175978g0010	aquaporin TIP1-1	MA_175978	AUGUSTUS	High	comp88830_c0_seq7	GO:0006810	biological_process	transport
							GO:0016020	cellular_component	membrane
53	MA_177954g0010	unknown	MA_177954	EuGene	High	comp87844_c0_seq1	NA
54	MA_182690g0010	---NA---	MA_182690	EuGene	Medium	comp95044_c0_seq2	NA
55	MA_183573g0010	BIG GRAIN 1-like A	MA_183573	AUGUSTUS	High	comp93190_c0_seq8	NA
56	MA_18369g0010	probable serine incorporator	MA_18369	EuGene	High	comp97633_c0_seq1	GO:0016020	cellular_component	membrane
							GO:0009536	cellular_component	plastid
57	MA_184317g0010	Dienelactone hydrolase	MA_184317	AUGUSTUS	Medium	comp43921_c0_seq1	NA
58	MA_185772g0010	BURP domain RD22	MA_185772	AUGUSTUS	High	comp86910_c0_seq1	NA
59	MA_18829g0010	probable beta-1,4-xylosyltransferase IRX10L	MA_18829	AUGUSTUS	High	comp89805_c0_seq1	GO:0005794	cellular_component	Golgi apparatus
							GO:0016020	cellular_component	membrane
60	MA_188576g0010	non-specific lipid-transfer 4	MA_188576	AUGUSTUS	High	comp89374_c1_seq1	NA
61	MA_190560g0010	ABA and WDS induced	MA_190560	AUGUSTUS	High	comp91924_c1_seq2	NA
62	MA_204527g0010	dnaJ homolog subfamily B member 6 isoform X3	MA_204527	AUGUSTUS	High	comp89406_c0_seq2	GO:0031072	molecular_function	heat shock protein binding
							GO:0006457	biological_process	protein folding
							GO:0051082	molecular_function	unfolded protein binding
63	MA_20700g0010	unknown	MA_20700	EuGene	High	comp93511_c0_seq4	NA
64	MA_21130g0010	chaperone 1	MA_21130	AUGUSTUS	High	comp85840_c3_seq1	GO:0006457	biological_process	protein folding
							GO:0016887	molecular_function	ATPase activity
							GO:0005524	molecular_function	ATP binding
							GO:0005515	molecular_function	protein binding
65	MA_212053g0010	kDa class I heat shock -like	MA_212053	AUGUSTUS	High	comp94777_c3_seq6	NA
66	MA_222427g0010	non-specific lipid-transfer 4-like	MA_222427	AUGUSTUS	High	comp89374_c1_seq1	GO:0016023	cellular_component	cytoplasmic membrane-bounded vesicle
67	MA_223085g0010	kDa class I heat shock -like	MA_223085	AUGUSTUS	Medium	comp94777_c3_seq6	NA
68	MA_225419g0010	water-stress inducible	MA_225419	AUGUSTUS	High	comp91924_c1_seq2	NA
69	MA_239048g0010	Acyl- -binding domain-containing 4	MA_239048	AUGUSTUS	Medium	comp82551_c0_seq2	NA
70	MA_24508g0010	cation H(+) antiporter 20	MA_24508	AUGUSTUS	High	comp96389_c0_seq8	GO:0005783	cellular_component	endoplasmic reticulum
							GO:0015299	molecular_function	solute:hydrogen antiporter activity
							GO:0016020	cellular_component	membrane
71	MA_245237g0010	cysteine desulfurase	MA_245237	AUGUSTUS	High	comp51845_c0_seq1	GO:0016740	molecular_function	transferase activity
							GO:0006790	biological_process	sulfur compound metabolic process
							GO:0016226	biological_process	iron-sulfur cluster assembly
							GO:0044238	biological_process	primary metabolic process
							GO:0010038	biological_process	response to metal ion
72	MA_24774g0010	kDa class I heat shock	MA_24774	AUGUSTUS	High	comp94777_c3_seq3	NA
73	MA_26069g0010	UPF0481 At3g02645	MA_26069	AUGUSTUS	Medium	comp95988_c0_seq5	NA
74	MA_262554g0010	unknown	MA_262554	AUGUSTUS	High	comp76374_c0_seq1	GO:0006979	biological_process	response to oxidative stress
75	MA_26630g0010	binding partner of ACD11 1 isoform X1	MA_26630	AUGUSTUS	High	comp95802_c1_seq1	NA
76	MA_27017g0010	---NA---	MA_27017	EuGene	Medium	comp91272_c0_seq1	NA
77	MA_29449g0010	hypothetical protein, partial	MA_29449	EuGene	High	comp93011_c0_seq3	NA
78	MA_29913g0010	heat stress transcription factor A-2b-like	MA_29913	AUGUSTUS	High	comp90981_c2_seq2	GO:0016023	cellular_component	cytoplasmic membrane-bounded vesicle
79	MA_3117g0010	B-box zinc finger 24-like	MA_3117	AUGUSTUS	High	comp92614_c0_seq2	NA
80	MA_318438g0010	SUPPRESSOR OF npr1- CONSTITUTIVE 1-like	MA_318438	AUGUSTUS	Medium	comp94273_c5_seq2	NA
81	MA_320320g0010	mitogen-activated kinase kinase kinase NPK1-like	MA_320320	AUGUSTUS	Medium	comp96661_c1_seq2	NA
82	MA_33275g0010	Brevis radix-like 4	MA_33275	AUGUSTUS	High	comp50637_c0_seq1	NA
83	MA_34351g0010	heat shock 70 kDa	MA_34351	AUGUSTUS	High	comp91323_c1_seq1	GO:0005524	molecular_function	ATP binding
							GO:0055114	biological_process	oxidation-reduction process
							GO:0006950	biological_process	response to stress
84	MA_34981g0010	universal stress PHOS34	MA_34981	AUGUSTUS	High	comp95239_c4_seq4	NA
85	MA_372983g0010	small heat shock chloroplastic	MA_372983	AUGUSTUS	High	comp92738_c1_seq2	GO:0006457	biological_process	protein folding
							GO:0009507	cellular_component	chloroplast
86	MA_38922g0010	heavy metal-associated isoprenylated plant 23-like	MA_38922	AUGUSTUS	High	comp44373_c0_seq2	NA
87	MA_41308g0010	alpha-galactosidase	MA_41308	AUGUSTUS	High	comp94690_c2_seq1	GO:0005975	biological_process	carbohydrate metabolic process
							GO:0043169	molecular_function	cation binding
88	MA_413668g0010	tau class glutathione S-transferase	MA_413668	AUGUSTUS	Medium	comp93472_c1_seq3	NA
89	MA_41964g0010	DUF3511 domain	MA_41964	AUGUSTUS	High	comp84852_c0_seq1	NA
90	MA_43044g0010	cysteine protease	MA_43044	AUGUSTUS	High	comp84311_c0_seq2	GO:0033554	biological_process	cellular response to stress
							GO:0030414	molecular_function	peptidase inhibitor activity
91	MA_442130g0010	glutamate decarboxylase	MA_442130	AUGUSTUS	High	comp86499_c0_seq1	GO:0016702	molecular_function	oxidoreductase activity, acting on single donors with incorporation of molecular oxygen, incorporation of two atoms of oxygen
							GO:0000041	biological_process	transition metal ion transport
							GO:0030170	molecular_function	pyridoxal phosphate binding
							GO:0055114	biological_process	oxidation-reduction process
							GO:0006536	biological_process	glutamate metabolic process
92	MA_447480g0010	kDa class I heat shock -like	MA_447480	AUGUSTUS	Medium	comp94777_c3_seq6	NA
93	MA_4491635g0010	uncharacterized protein LOC110885564	MA_4491635	AUGUSTUS	High	comp367661_c0_seq1	NA
94	MA_471976g0010	dnaJ homolog 1-like	MA_471976	AUGUSTUS	High	comp84322_c0_seq1	GO:0006457	biological_process	protein folding
							GO:0005488	molecular_function	binding
95	MA_483877g0010	unknown	MA_483877	EuGene	Medium	comp91250_c0_seq1	NA
96	MA_504741g0010	probable LRR receptor-like serine threonine- kinase At1g05700	MA_504741	AUGUSTUS	Medium	comp96448_c1_seq2	NA
97	MA_522798g0010	probable disease resistance At4g33300	MA_522798	AUGUSTUS	High	comp48975_c0_seq1	NA
98	MA_568538g0010	extensin	MA_568538	AUGUSTUS	High	comp87250_c0_seq1	NA
99	MA_5874579g0010	---NA---	MA_5874579	AUGUSTUS	High	comp50440_c0_seq1	NA
100	MA_605776g0010	small heat shock chloroplastic	MA_605776	AUGUSTUS	High	comp86197_c0_seq1	GO:0006457	biological_process	protein folding
101	MA_6570g0010	ACT domain-containing ACR3	MA_6570	EuGene	High	comp87232_c0_seq1	GO:0016757	molecular_function	transferase activity, transferring glycosyl groups
							GO:0019344	biological_process	cysteine biosynthetic process
							GO:0016597	molecular_function	amino acid binding
102	MA_665331g0010	probable leucine-rich repeat receptor kinase At5g49770	MA_665331	AUGUSTUS	High	comp94322_c2_seq6	GO:0004672	molecular_function	protein kinase activity
							GO:0016310	biological_process	phosphorylation
103	MA_670512g0010	basic leucine zipper and W2 domain-containing 2-like	MA_670512	EuGene	Medium	comp42794_c0_seq1	NA
104	MA_673728g0010	hippocampus abundant transcript 1 isoform X1	MA_673728	AUGUSTUS	Medium	comp76095_c1_seq1	NA
105	MA_7001519g0010	ALUMINUM SENSITIVE 3	MA_7001519	EuGene	High	comp79996_c0_seq1	GO:0005886	cellular_component	plasma membrane
106	MA_7016698g0010	small heat-shock	MA_7016698	AUGUSTUS	High	comp94776_c0_seq12	NA
107	MA_7125630g0010	unknown	MA_7125630	AUGUSTUS	Medium	comp95687_c0_seq12	NA
108	MA_773426g0010	unknown	MA_773426	AUGUSTUS	High	comp50225_c0_seq1	NA
109	MA_7766880g0010	galactinol synthase 1	MA_7766880	AUGUSTUS	High	comp90577_c0_seq1	GO:0016757	molecular_function	transferase activity, transferring glycosyl groups
110	MA_77993g0010	zinc finger 8	MA_77993	AUGUSTUS	Medium	comp89925_c0_seq1	NA
111	MA_79011g0010	leucine-rich repeat receptor-like serine threonine- kinase At2g24130	MA_79011	EuGene	Medium	comp96726_c2_seq1	NA
112	MA_79708g0010	tubulin beta chain isoform X9	MA_79708	AUGUSTUS	High	comp94997_c3_seq2	GO:0005737	cellular_component	cytoplasm
							GO:0005874	cellular_component	microtubule
							GO:0005525	molecular_function	GTP binding
							GO:0005198	molecular_function	structural molecule activity
							GO:0007018	biological_process	microtubule-based movement
							GO:0003924	molecular_function	GTPase activity
							GO:0051258	biological_process	protein polymerization
113	MA_8281887g0010	unknown	MA_8281887	AUGUSTUS	High	comp94040_c2_seq9	NA
114	MA_8389610g0010	probable disease resistance At1g61300	MA_8389610	AUGUSTUS	Medium	comp93311_c0_seq1	NA
115	MA_8467692g0010	kDa class I heat shock -like	MA_8467692	AUGUSTUS	Medium	comp88170_c1_seq1	NA
116	MA_86162g0020	---NA---	MA_86162	EuGene	Medium	comp49831_c0_seq1	NA
117	MA_86473g0010	AF064080_1MADS-domain DAL10	MA_86473	AUGUSTUS	High	comp83766_c0_seq1	NA
118	MA_875075g0010	DUF1223 domain-containing	MA_875075	AUGUSTUS	High	comp70494_c0_seq1	NA
119	MA_8963386g0010	NBS-LRR	MA_8963386	AUGUSTUS	Medium	comp96722_c0_seq1	NA
120	MA_9035900g0010	heat shock 22 kDa mitochondrial isoform X2	MA_9035900	AUGUSTUS	High	comp91889_c0_seq3	NA
121	MA_93746g0010	kDa class I heat shock -like	MA_93746	AUGUSTUS	High	comp88170_c1_seq1	GO:0006950	biological_process	response to stress
122	MA_94546g0010	thioredoxin	MA_94546	AUGUSTUS	High	comp86619_c0_seq1	NA
123	MA_9472752g0010	rare cold inducible	MA_9472752	EuGene	High	NA	GO:0007030	biological_process	Golgi organization
							GO:0016021	cellular_component	integral to membrane
							GO:0006096	biological_process	glycolysis
124	MA_9551351g0010	vacuolar amino acid transporter 1 isoform X1	MA_9551351	AUGUSTUS	Medium	comp73854_c0_seq1	NA
125	MA_95739g0010	catechol O-methyltransferase	MA_95739	AUGUSTUS	High	comp89454_c1_seq2	GO:0008168	molecular_function	methyltransferase activity
							GO:0044237	biological_process	cellular metabolic process
126	MA_95995g0010	late embryogenesis abundant type 2 dehydrin	MA_95995	AUGUSTUS	High	comp93511_c1_seq1	NA
127	MA_96649g0010	unknown	MA_96649	EuGene	High	comp83147_c0_seq1	NA
128	MA_9668286g0010	unknown	MA_9668286	AUGUSTUS	Medium	comp92738_c1_seq2	NA
129	MA_9957372g0010	water-stress inducible	MA_9957372	AUGUSTUS	High	comp91924_c1_seq2	NA

## Sheet: FEA
Functional Enrichment analysis
Significantly enriched GO terms in the upregulated gene sets with higher transcript abundance in the heterobasidion (-) group											Significantly enriched GO terms in the downregulated gene sets with higher transcript abundance in the heterobasidion (-) group
											GO - Biological process
Summary of GO Slims											GO id	Pval (corrected)	Statistics	Description
Functional Enrichment analysis GO- biological process											GO:0008152	0.0003137	64/151 | 6587/28109	metabolic process
GO id	Pval (corrected)	Statistics	Description								GO:0051704	0.008102	15/151 | 853/28109	multi-organism process
GO:0009642	1.054e-09	11/66 | 156/28109	response to light intensity								GO:0009620	0.008851	8/151 | 238/28109	response to fungus
GO:0009408	1.054e-09	10/66 | 156/28109	response to heat								GO:0042221	0.009014	27/151 | 2226/28109	response to chemical stimulus
GO:0009644	2.571e-09	11/66 | 126/28109	response to high light intensity								GO:0009888	0.009392	6/151 | 131/28109	tissue development
GO:0006979	3.178e-09	12/66 | 329/28109	response to oxidative stress								GO:0009753	0.009882	8/151 | 263/28109	response to jasmonic acid stimulus
GO:0000302	4.517e-09	11/66 | 198/28109	response to reactive oxygen species								GO:0009607	0.01004	15/151 | 898/28109	response to biotic stimulus
GO:0006457	4.815e-09	11/66 | 203/28109	protein folding								GO:0044710	0.01102	31/151 | 2715/28109	single-organism metabolic process
GO:0042542	5.555e-09	11/66 | 146/28109	response to hydrogen peroxide								GO:0050896	0.01166	39/151 | 3981/28109	response to stimulus
GO:0010035	1.518e-08	15/66 | 759/28109	response to inorganic substance								GO:0046482	0.01178	4/151 | 35/28109	para-aminobenzoic acid metabolic process
GO:0009266	1.134e-07	12/66 | 495/28109	response to temperature stimulus								GO:0006730	0.01226	4/151 | 49/28109	one-carbon metabolic process
GO:0010286	1.373e-06	5/66 | 36/28109	heat acclimation								GO:0010089	0.0141	4/151 | 53/28109	xylem development
GO:0009416	1.547e-05	11/66 | 640/28109	response to light stimulus								GO:0051707	0.01451	15/151 | 804/28109	response to other organism
GO:0009314	2.216e-05	11/66 | 675/28109	response to radiation								GO:0009719	0.01847	16/151 | 1091/28109	response to endogenous stimulus
GO:0006950	2.244e-05	19/66 | 2201/28109	response to stress								GO:0009725	0.01875	15/151 | 988/28109	response to hormone stimulus
GO:1901700	6.022e-05	14/66 | 1284/28109	response to oxygen-containing compound								GO:0044273	0.02426	3/151 | 27/28109	sulfur compound catabolic process
GO:0009628	0.0007146	14/66 | 1602/28109	response to abiotic stimulus								GO:0010087	0.03501	4/151 | 72/28109	phloem or xylem histogenesis
GO:0050896	0.0007912	23/66 | 3981/28109	response to stimulus								GO:0033554	0.04223	11/151 | 653/28109	cellular response to stress
GO:0042221	0.001585	16/66 | 2226/28109	response to chemical stimulus								GO:0009072	0.04274	5/151 | 134/28109	aromatic amino acid family metabolic process
GO:0044267	0.0103	12/66 | 1590/28109	cellular protein metabolic process
GO:0034976	0.03032	4/66 | 183/28109	response to endoplasmic reticulum stress
												GO - Molecular function
											GO id	Pval (corrected)	Statistics	Description
											GO:0016829	2.094e-08	16/181 | 287/32226	lyase activity
											GO:0016491	2.757e-08	35/181 | 1493/32226	oxidoreductase activity
											GO:0003824	3.18e-08	108/181 | 7190/32226	catalytic activity
											GO:0016740	5.191e-05	37/181 | 2722/32226	transferase activity
											GO:0016830	0.0002307	6/181 | 72/32226	carbon-carbon lyase activity
											GO:0046872	0.0002346	22/181 | 1266/32226	metal ion binding
											GO:0005506	0.0003182	7/181 | 122/32226	iron ion binding
											GO:0043169	0.0003219	22/181 | 1319/32226	cation binding
											GO:0016831	0.0003824	5/181 | 49/32226	carboxy-lyase activity
											GO:0016835	0.000692	6/181 | 95/32226	carbon-oxygen lyase activity
											GO:0043167	0.0008291	30/181 | 2356/32226	ion binding
											GO:0010333	0.002622	3/181 | 15/32226	terpene synthase activity
											GO:0052681	0.003008	2/181 | 3/32226	alpha-bisabolene synthase activity
											GO:0046914	0.004146	12/181 | 591/32226	transition metal ion binding
											GO:0016838	0.005981	3/181 | 21/32226	carbon-oxygen lyase activity, acting on phosphates
											GO:0016798	0.01036	8/181 | 311/32226	hydrolase activity, acting on glycosyl bonds
											GO:0000287	0.01794	4/181 | 73/32226	magnesium ion binding
											GO:0005488	0.01853	47/181 | 5213/32226	binding
											GO:0004103	0.01886	2/181 | 8/32226	choline kinase activity
											GO:0018826	0.03314	2/181 | 11/32226	methionine gamma-lyase activity
											GO:0004611	0.03314	2/181 | 11/32226	phosphoenolpyruvate carboxykinase activity
											GO:0042625	0.03334	4/181 | 91/32226	ATPase activity, coupled to transmembrane movement of ions
											GO:0004351	0.03467	2/181 | 12/32226	glutamate decarboxylase activity
											GO:0004612	0.03467	2/181 | 12/32226	phosphoenolpyruvate carboxykinase (ATP) activity
											GO:0016682	0.04175	3/181 | 48/32226	oxidoreductase activity, acting on diphenols and related substances as donors, oxygen as acceptor

[truncated: 3 more sheets: GO down regulated (-) group, GO figures (-) group, Drought related]
